# Supplementary material for: Increased interleukin-18 level contributes to the development and severity of ischemic stroke
Source: publisher site journal article supplement (doi:10.18632/aging.102253), 2019-09-16
Supplement: Supplementary file [file aging-v11i18-102253-supplementary-material-SD1.pdf]

**SUPPLEMENTARY FIGURES**

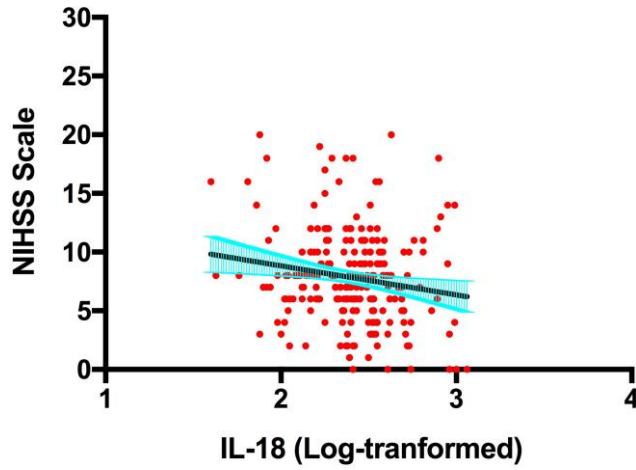

**Supplementary Figure 1.** The correlation between IL-18 levels and NIHSS scale in patients.

**A**

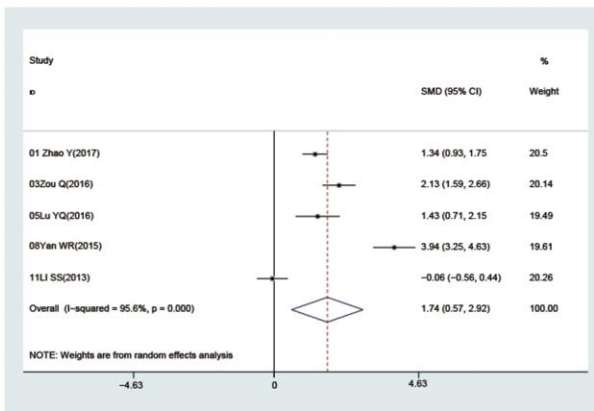

**B**

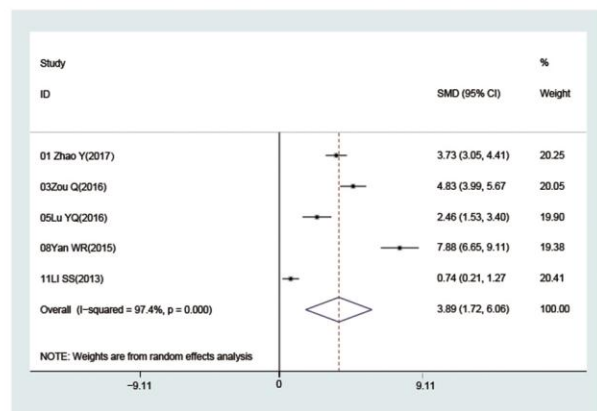

**C**

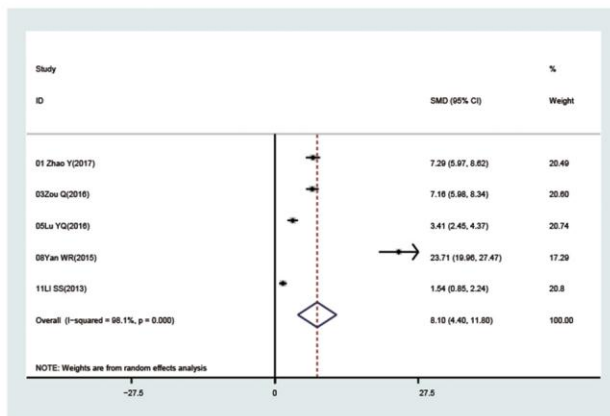

**Supplementary Figure 2.** Comparison of IL-18 levels in patients with different severity of cerebral infarction and normal healthy individuals (A: mild, B: moderate, C: severe).

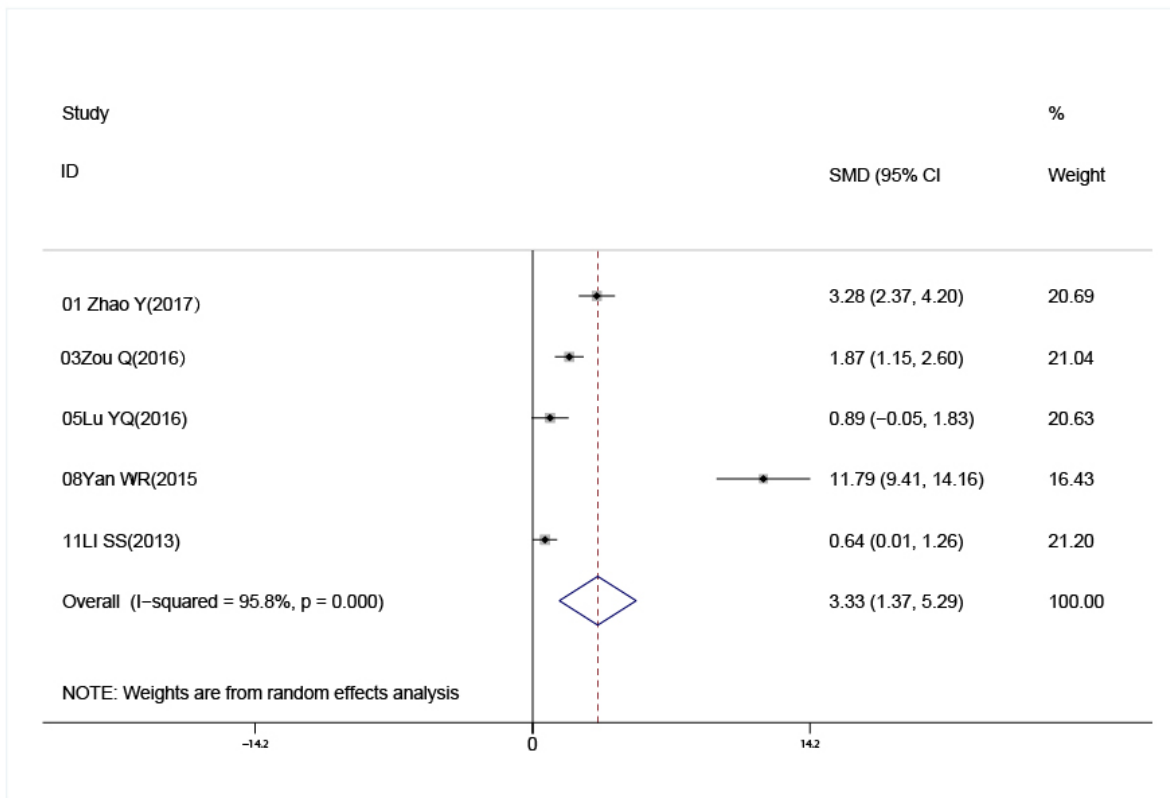

**Supplementary Figure 3. Comparison of IL-18 levels between severe cerebral infarction patients and moderate cerebral infarction patients.**

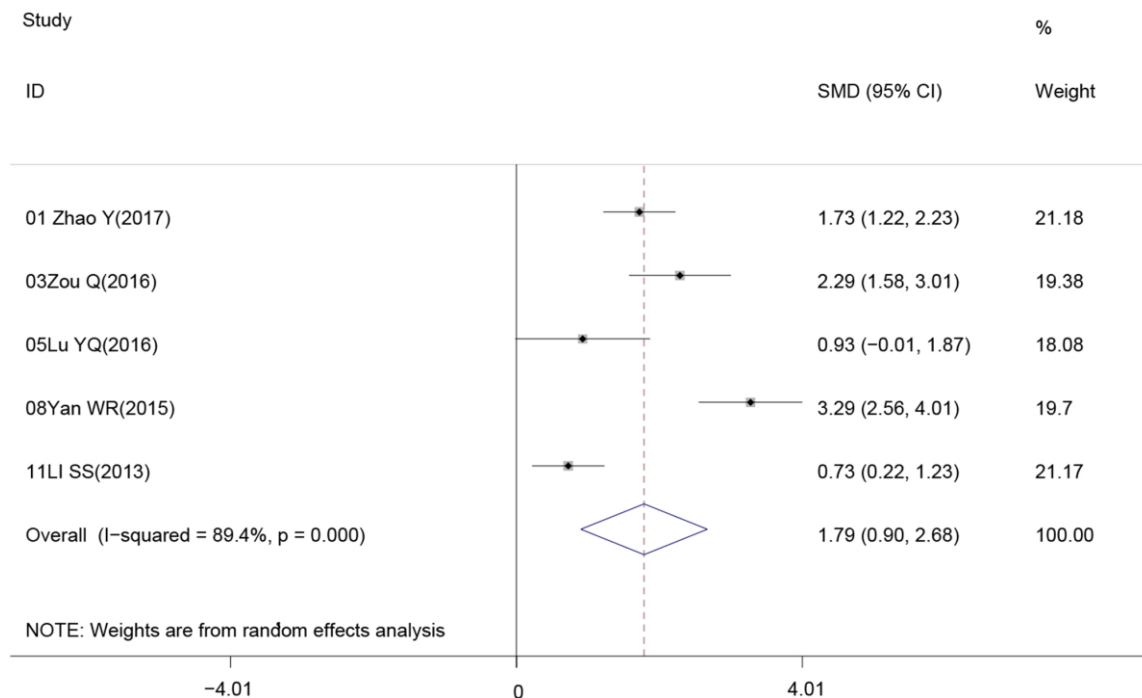

**Supplementary Figure 4. Comparison of IL-18 levels between severe cerebral infarction patients and mild cerebral infarction patient.**
